# Supplementary material
Source: PubMed Central journal article supplement (PMC4596668)
Supplement: 10.1534_115.179788_genetics.115.179788-1.pdf [file 10.1534_115.179788_genetics.115.179788-1.pdf]

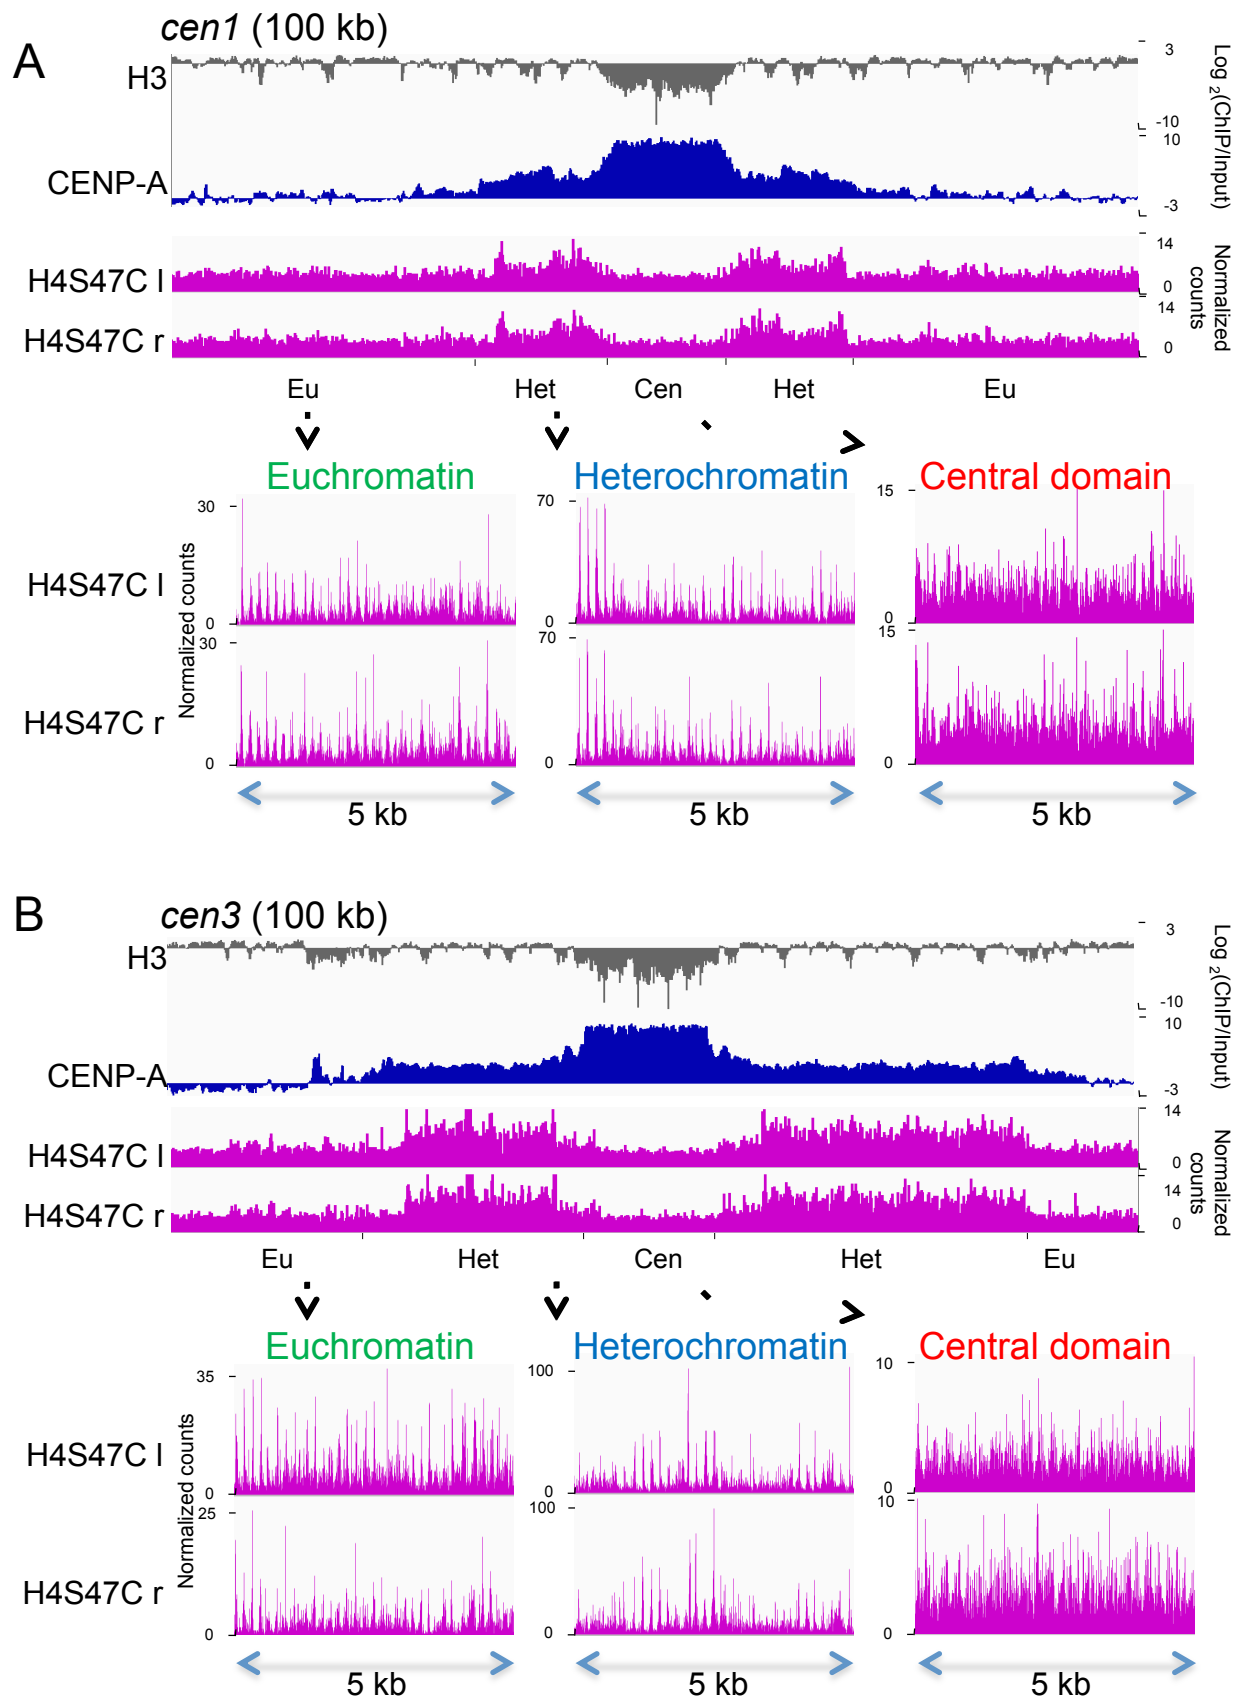

Figure S1. Chemical cleavage mapping for *cen1* and *cen3*. See legend to Figure 1A.

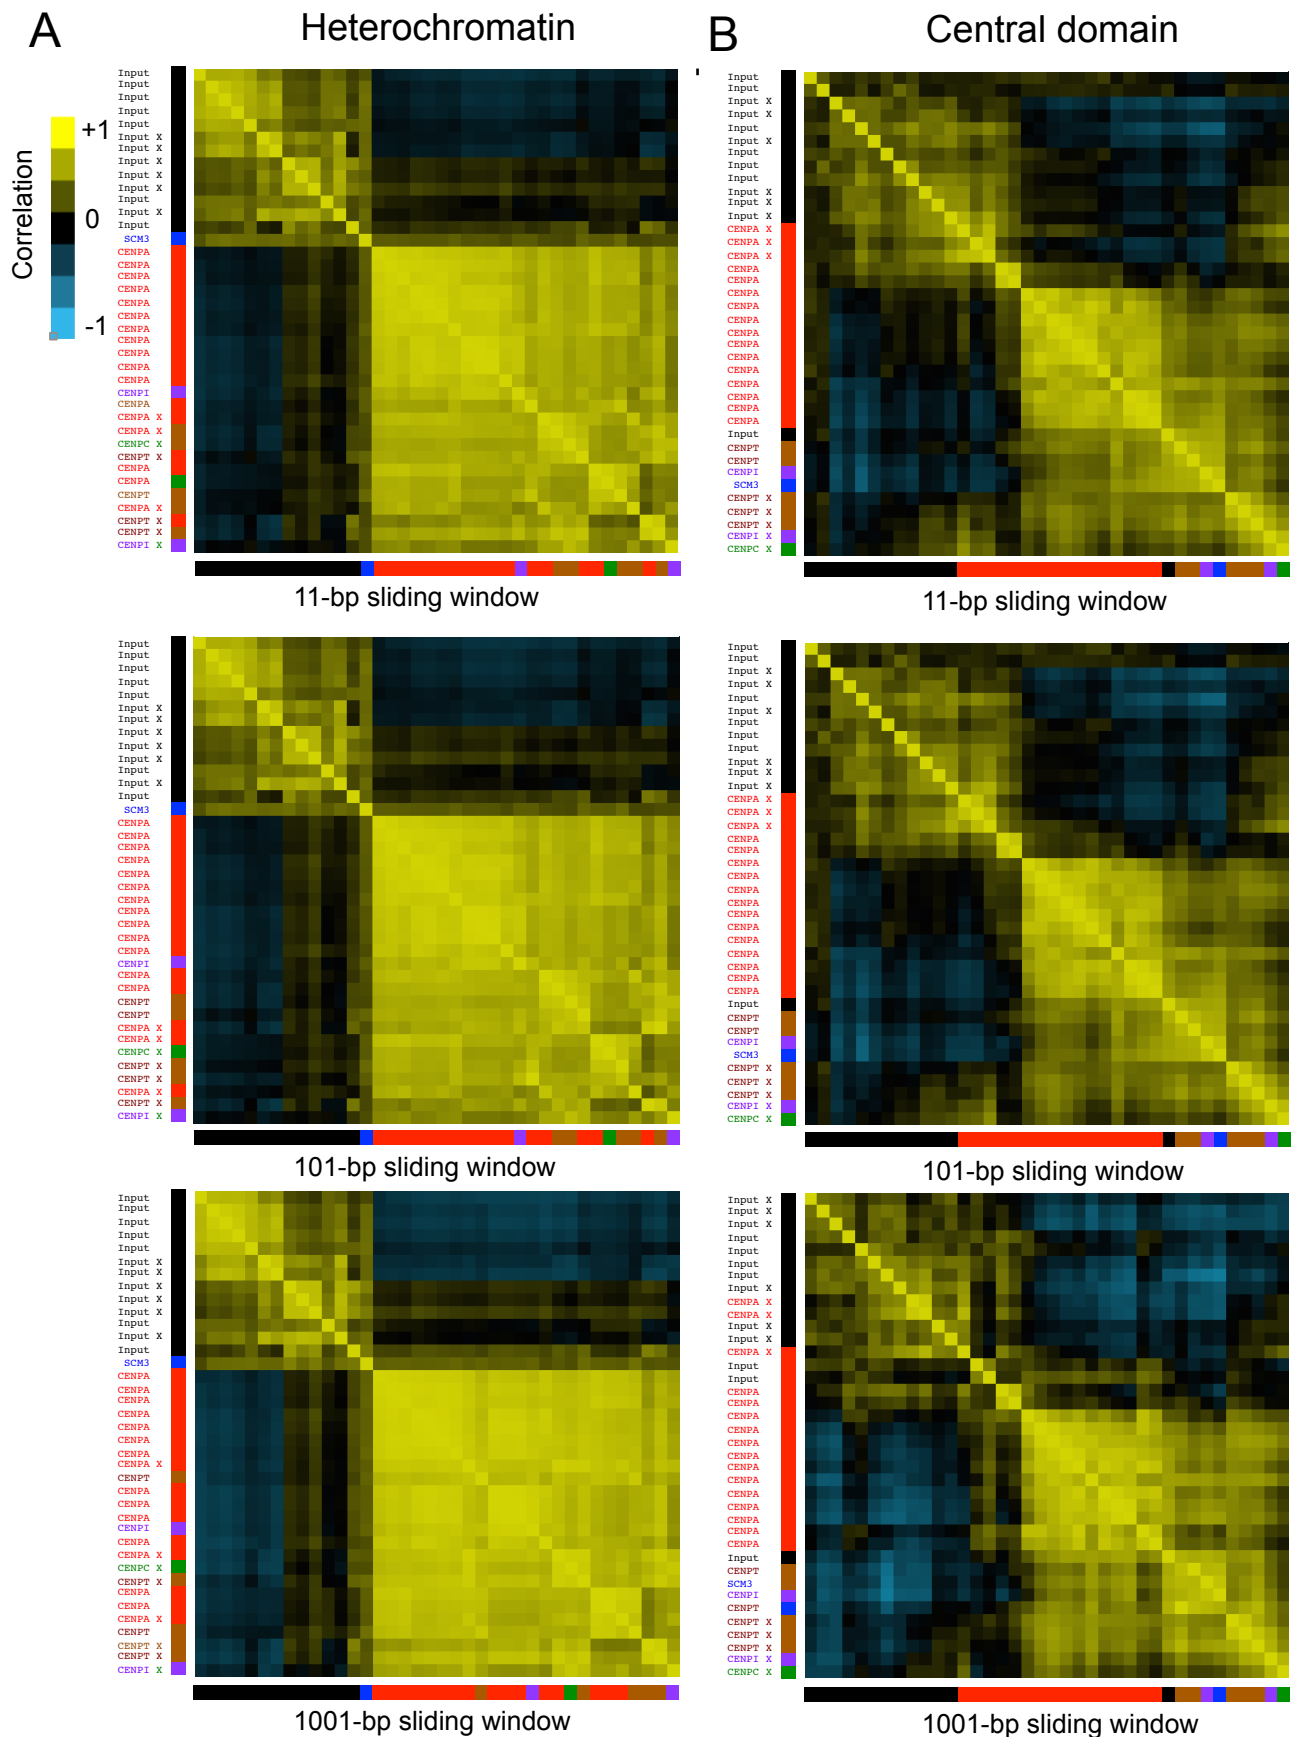

Figure S2. Correlation matrix heat maps with smoothing. See the legend to Figure 5. Triangular smoothing was applied using sliding windows as indicated.

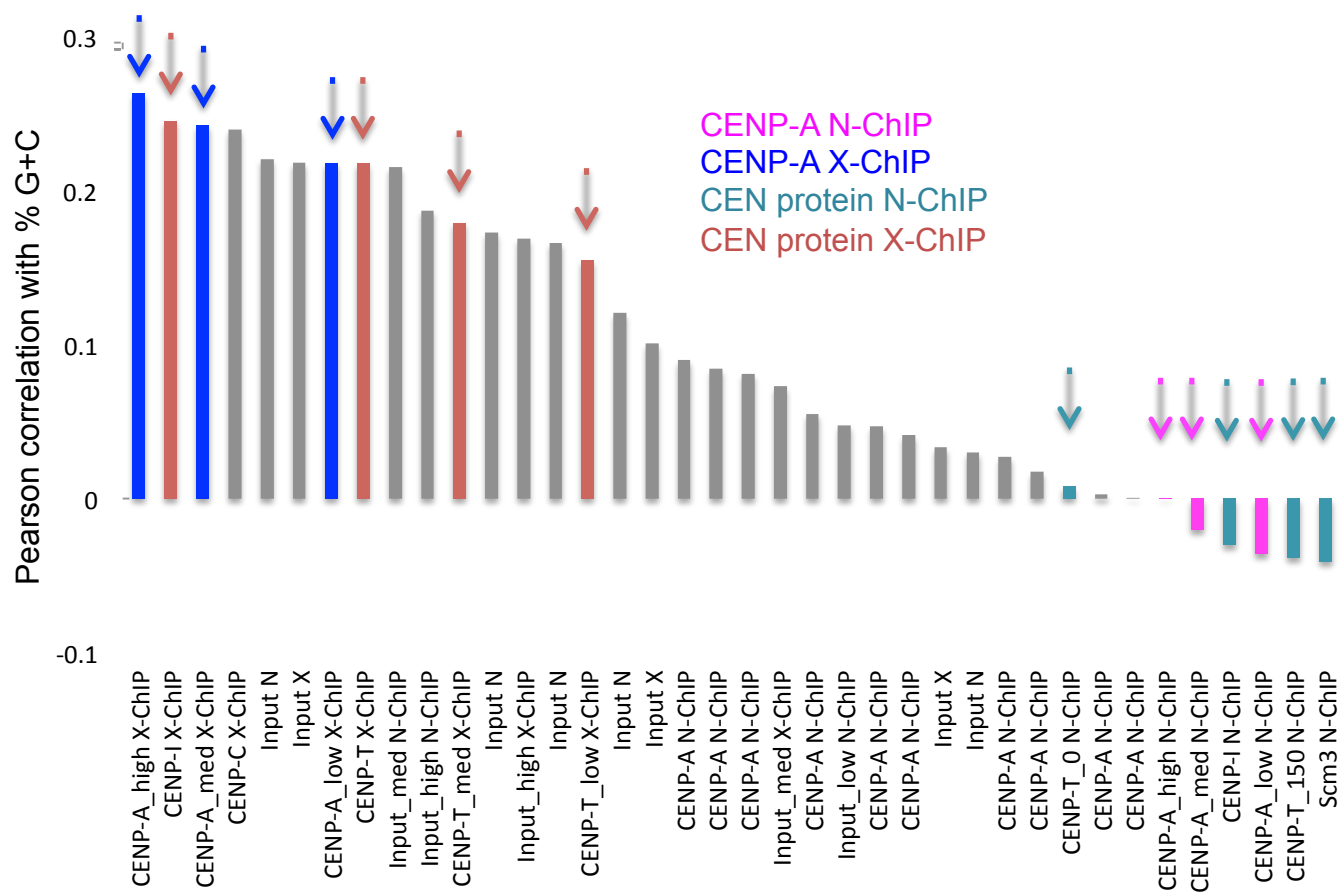

Figure S3. Correlation of GC content with signal in 38 ChIP datasets. Arrows correspond to datasets displayed in Figure 4.

**Table S1** *S pombe* strains used in the study.

| Strain  | Genotype                                                                   | Source                           |
|---------|----------------------------------------------------------------------------|----------------------------------|
| FY20724 | <i>h minus cnp1-FLAG::kanR</i>                                             | NBRP, Japan<br>PMID: 21445296    |
| PE199   | <i>h minus leu1 ade6 cnp20-FLAG::kanR</i>                                  | Takeshi Sakuno<br>PMID: 19758558 |
| FY8393  | <i>h minus leu1 mis6-HA[LEU2]</i>                                          | NBRP, Japan<br>PMID: 9230309     |
| FY21240 | <i>h minus scm3-FLAG[hph]</i>                                              | NBRP, Japan<br>PMID: 19217403    |
| FY20571 | <i>h minus lys::cnp1-HA Lys+</i>                                           | NBRP, Japan<br>PMID: 10864871    |
| FY8426  | <i>h minus leu1 ura4 mis6-GFP[LEU2]</i>                                    | NBRP, Japan<br>PMID: 9230309     |
| hy067   | <i>h minus leu1-32 ura4DS/E ade6-210<br/>cnt1::ura4+ pREP41-myc-cnp3</i>   | Songtao Jia<br>PMID: 19910462    |
| H4S47C  | <i>h minus his3-D1 leu1-32 ura4-D18 ade6-<br/>M210, hhf1S47C, hhf2S47C</i> | Ji-Ping Wang<br>PMID: 24277842   |
