# Supplementary material
Source: PubMed Central journal article supplement (PMC4596668)
Supplement: 10.1534_115.179788_genetics.115.179788-5.pdf [file 10.1534_115.179788_genetics.115.179788-5.pdf]

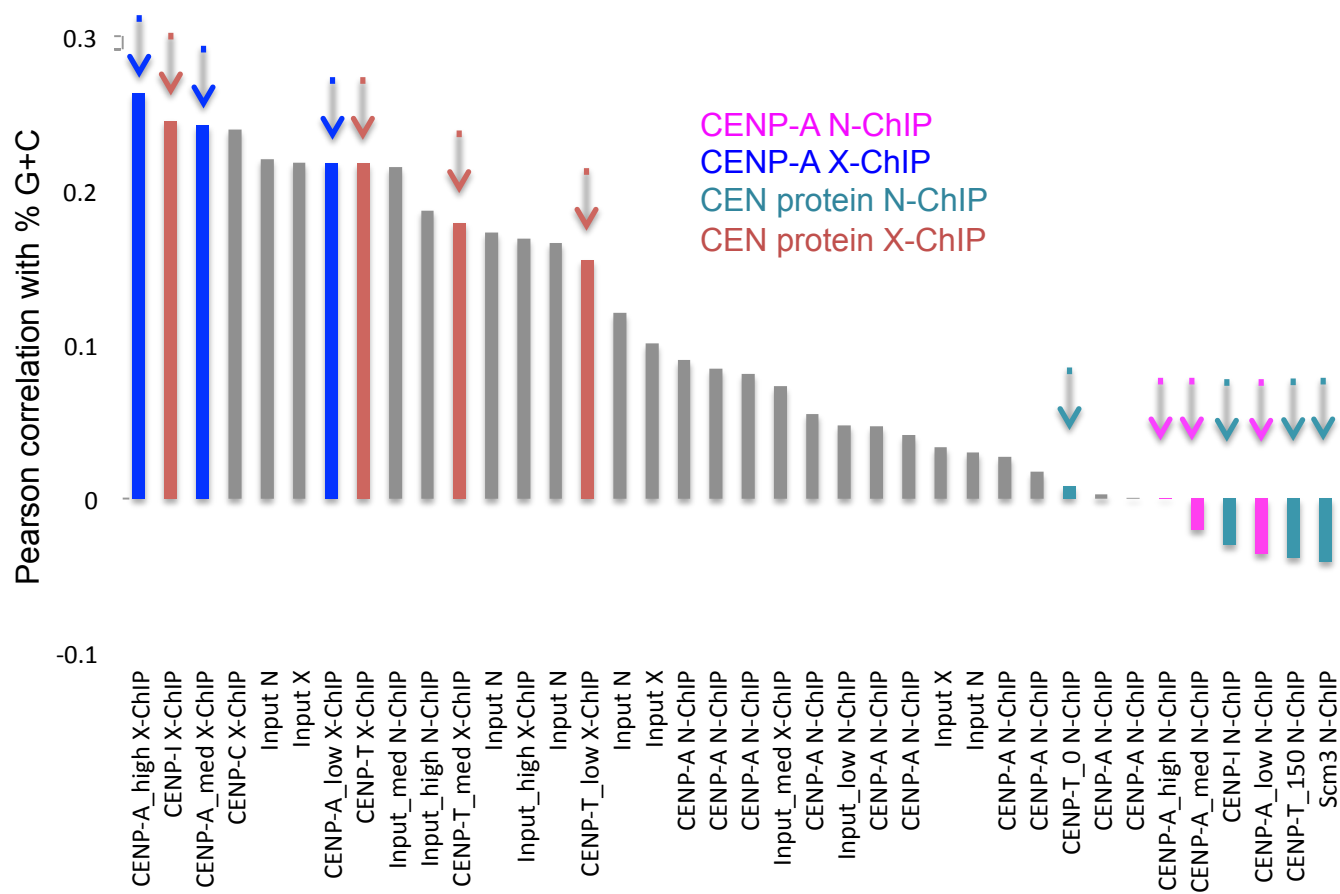

Figure S3. Correlation of GC content with signal in 38 ChIP datasets. Arrows correspond to datasets displayed in Figure 4.
